# Supplementary material for: ‘It’s going to change the way we train’: Qualitative evaluation of a&nbsp;transformative faculty development workshop
Source: Springer Nature journal article supplement (doi:10.1007/s40037-021-00687-4), 2021-10-25
Supplement: MOESM4 [file 19793762]

Pre-Congress Workshop

**OPTIMISING LEARNING WITH TASK TRAINERS (OLTT)**

20 Sep 2018 (Thu) | Academia, Level 2, PSL 2 & Surgical Simulation Lab | 8.30am - 3.00pm

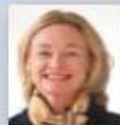

SPEAKER

**Prof Debra Nestel**

Professor of Surgical Education,  
Department of Surgery  
University of Melbourne, Australia

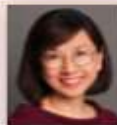

SPEAKER

**Adj Assoc Prof Caroline Ong**

Vice Chair (Postgraduate Education)  
SingHealth Duke-NUS Surgery Academic Clinical  
Programme

**INTRODUCTION**

Teaching and learning of procedures and/ or surgical operations involves development of knowledge, psychomotor and cognitive skills. Simulation improves patient safety as it allows learning and practice away from the patient, so task trainers are often used to aid skills development. Task trainers may be used to teach basic skills (e.g. suturing sets, intubation models, catheter insertion models) or more advanced surgical skills (e.g. laparoscopic box trainers, computerised endoscopy units, animal and/or cadaveric models). Optimal use of task trainers in skills development involves using effective teaching methods in a well-designed curriculum that is integrated with the overall curriculum for the learners.

**LEARNING OBJECTIVES**

At the end of the workshop, participants will be able to :

- Discuss benefits of using task trainers in skills development
- Discuss limitations of using task trainers in skills development
- Describe models of skills development and training
- Describe the role of feedback in task trainer-based skills development
- Design a learning plan that uses a task trainer to support the development of a skill

**WHO SHOULD ATTEND**

- Faculty who are responsible for creating programs for development of procedural or surgical skills in their learners.
- All faculty who teach procedural and/or surgical skills using task trainers.

**REGISTRATION FEES**

\$ 350.00 (Before GST)

Fee after subsidy: \$ 250.00 (Before GST) - \$100 is sponsored by Surgery ACP)

**REGISTRATION**

SingHealth PECT Faculty **will be funded** by the PECT Faculty Development Fund respectively.

- For Medical PECT Faculty, please indicate your interest through your respective ACPs.
- For SingHealth Nursing PECT Faculty, please indicate your interest through [nursing@singhealthacademy.edu.sg](mailto:nursing@singhealthacademy.edu.sg).
- For SingHealth Allied Health PECT Faculty, please indicate your interest through [alliedhealth@singhealthacademy.edu.sg](mailto:alliedhealth@singhealthacademy.edu.sg).

The final application will be done through the Education Grant Call Application in May 2018.

For all others, please email the attached registration form to: [sims@singhealth.com.sg](mailto:sims@singhealth.com.sg)

**ENQUIRIES**

[sims@singhealth.com.sg](mailto:sims@singhealth.com.sg)

DID: 6576 7102

**REGISTER BY  
31 JUL 2018**

Organiser

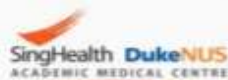

Secretariat

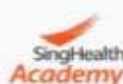

Workshop Organisers

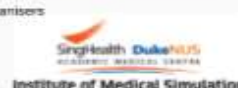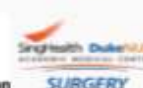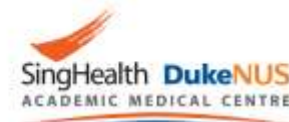

**Selection of slides from workshop 2018**

# **Optimizing learning with task trainers**

**SIMS 20 Sep 2018**

**Singhealth-Duke NUS Scientific Congress**

## Invited faculty

### Debra Nestel

PhD FoME FSSH

Professor of Simulation Education in  
Healthcare

Monash University

Professor of Surgical Education

University of Melbourne

## Local faculty

### Caroline Ong

MBBS FRCS M Surgical Ed

VC Education (Postgrad) Surgery ACP

Senior Consultant Paediatric Surgery KKH

### Chong Shin Yuet

MBBS (Hons) M Med (Anaes)

Director Simulation Training Anaesthesiology Periop Svc ACP

Senior Consultant Anaesthesia SGH /SKH

### Sharon Ong

MBBS M Med (Anaes)

APD Anaesthesia Residency

Senior Consultant, Intensive Care & Anesthesia SGH/ SKH

# Aim

---

- To explore educational processes associated with task trainers and skills development using simulation

# Learning objectives

---

After this workshop, you will be able to:

1. Describe **models of skills development** and training
2. Discuss **benefits** of using task trainers in skills development
3. Discuss **limitations** of using task trainers in skills development
4. Describe the **role of feedback** in task trainer-based skills development
5. **Design a learning plan** that uses a task trainer to support the development of a skill

# Sessions

---

1. Simulation fundamentals
2. Overview of skills development
3. Role of feedback in learning
4. Design and implement a lesson plan
5. Reflections, closing and action plan

---

# Simulation fundamentals

Session 1

# Simulation phases

---

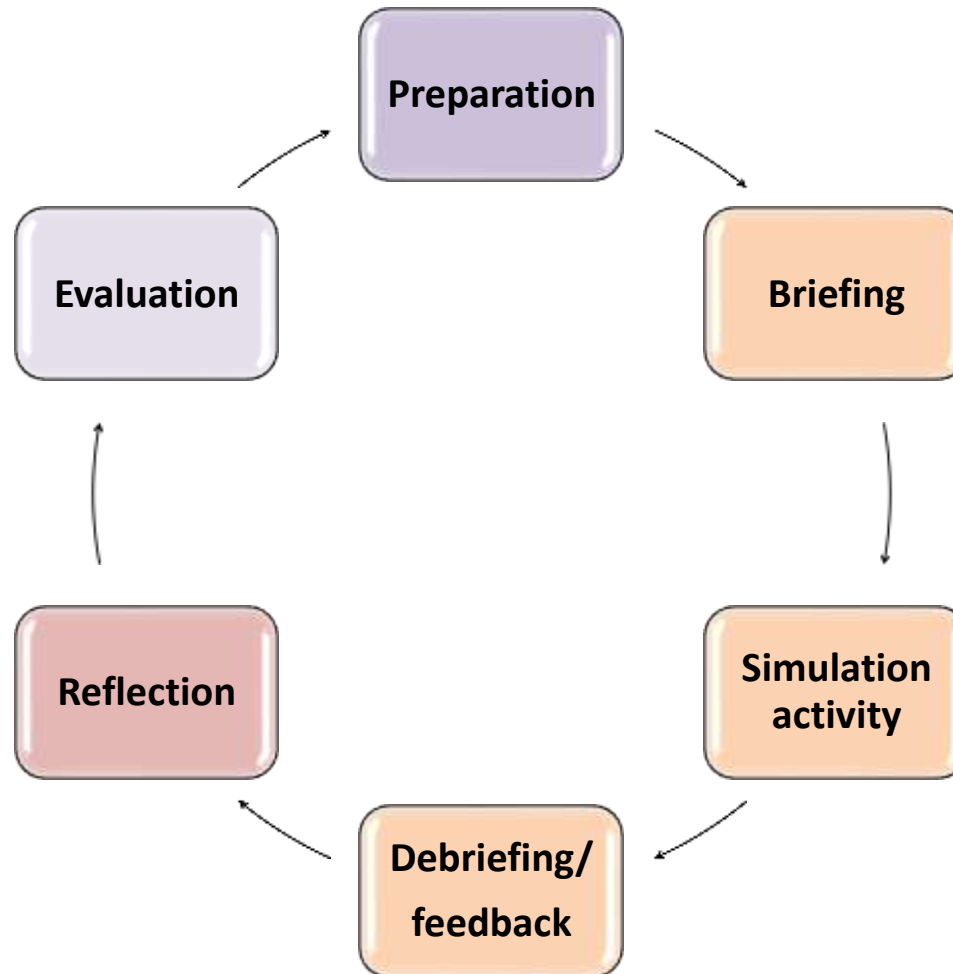



# Pre-reading

---

**Wulf, G., et al. (2010).**

Motor skill learning and performance: a review of influential factors.  
*Medical Education, 44(1), 75-84.*

**Hatala, R., et al (2013).**

Feedback for simulation-based procedural skills training: a meta-analysis and critical narrative synthesis.  
*Advances in Health Sciences Education, 1-22.*

**Nicholls, D., et al. (2016)**

Teaching psychomotor skills in the twenty-first century: Revisiting and reviewing instructional approaches through the lens of contemporary literature.

*Med Teach, 38(10), 1056-1063.*

# Task trainers

---

- Task trainers focus on supporting learning of a **particular task** or **motor skill**
- “Skills such as picking up objects, suturing, knot tying, applying clips, inserting an endotracheal tube and applying a tourniquet are examples of such tasks.”

(Kunkler, 2006)

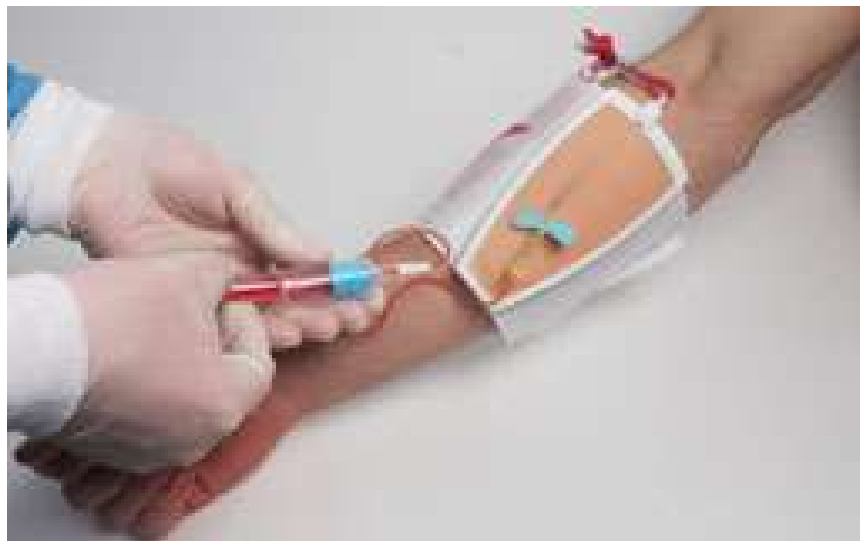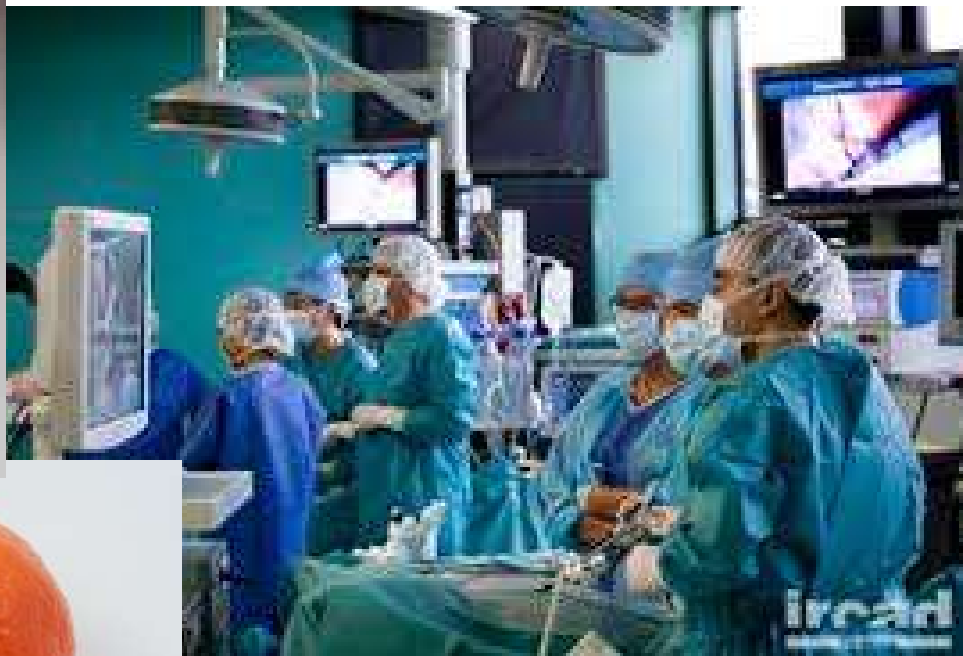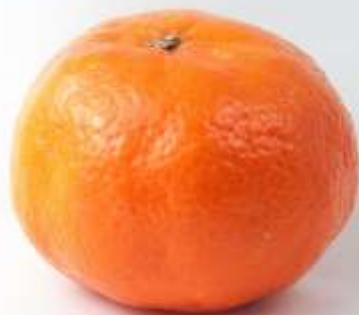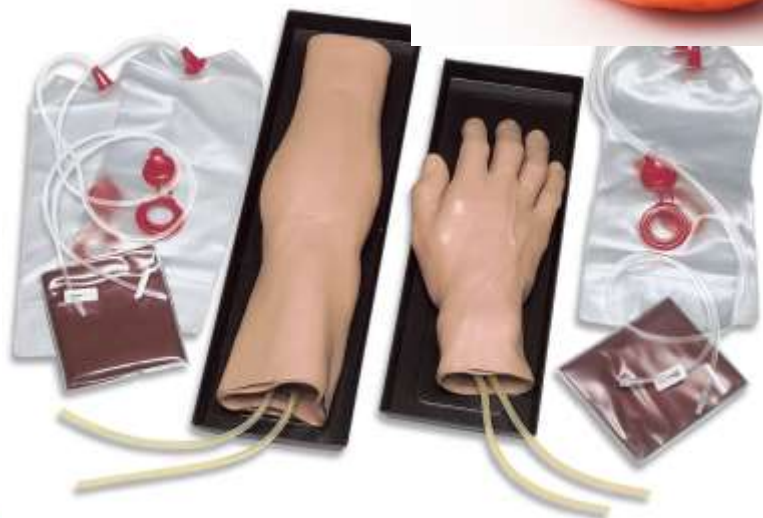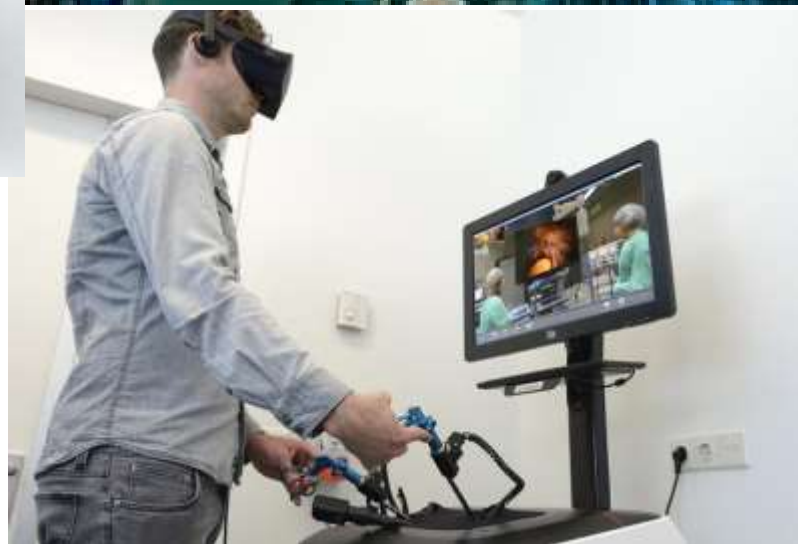

# Activity #3 and #4: Task trainers

---

- Which task trainers do you use?
- Select one of the task trainers you use to answer the next questions:
- What are the benefits?
- What are the limitations?

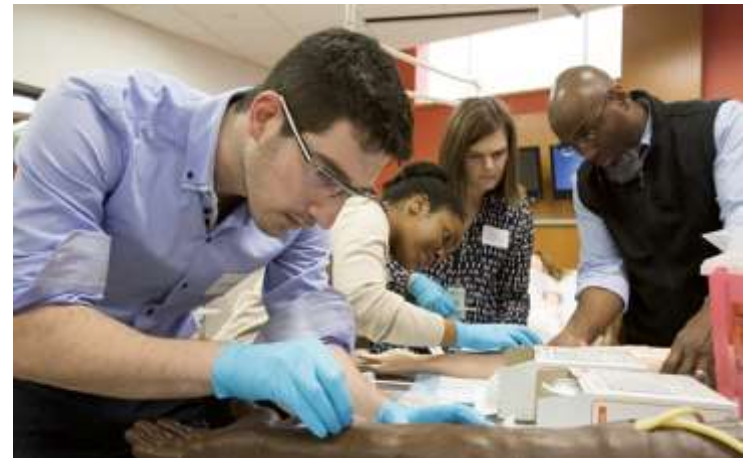

# Benefits / Limitations

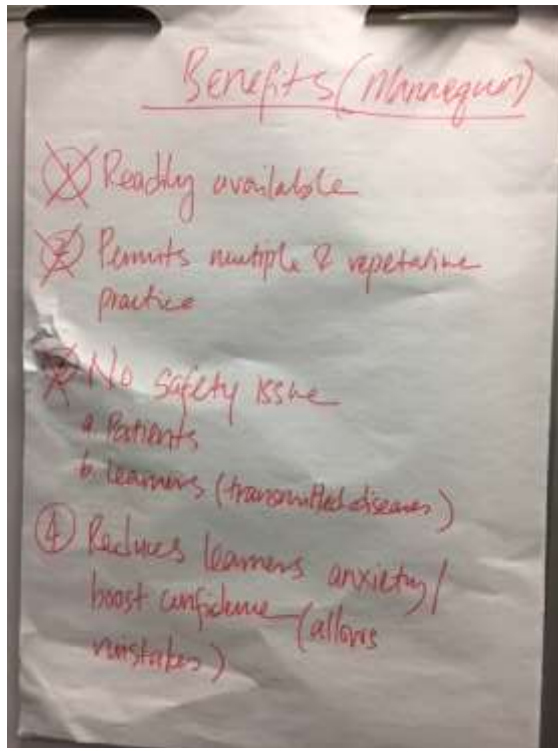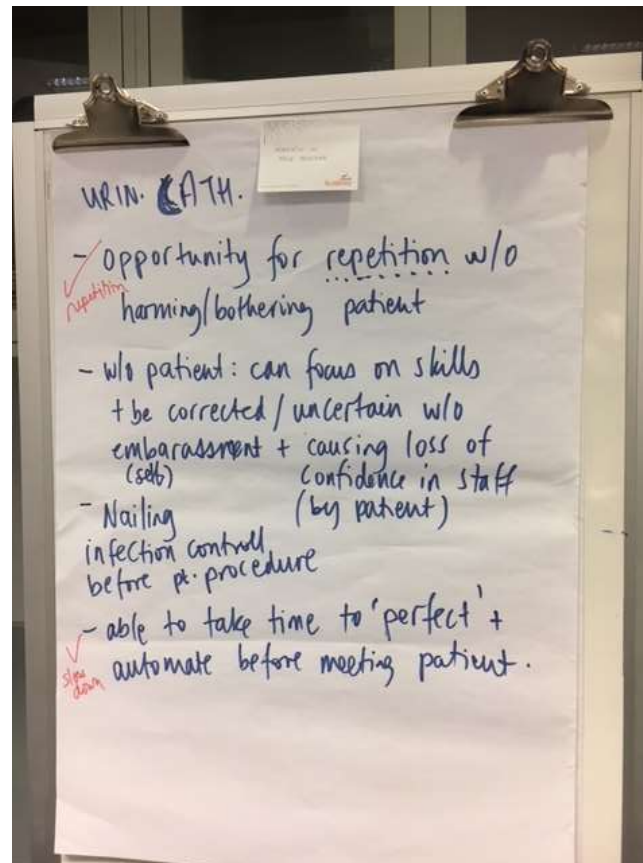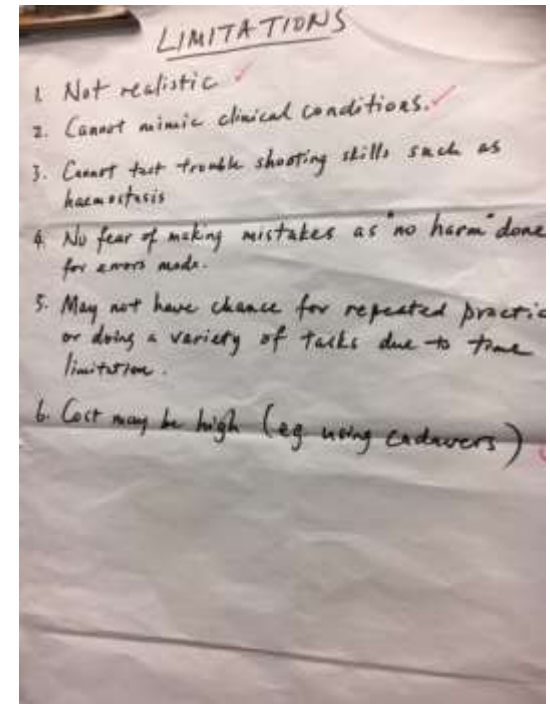

---

# **Overview of skills development**

Session 2

# Fitts (1964); Fitts and Posner (1967)

| Stages of learning | Characteristics                                                                              | Attentional demands                                              |
|--------------------|----------------------------------------------------------------------------------------------|------------------------------------------------------------------|
| Cognitive (verbal) | Movements are slow, inconsistent and inefficient<br>Considerable cognitive activity required | Large parts of the movement are consciously controlled           |
| Associative        | Movements are more fluid, reliable and inefficient<br>Less cognitive activity is required    | Some movements are controlled consciously and some automatically |
| Autonomous (motor) | Movements are accurate, reliable and efficient<br>Less or no cognitive activity is required  | Movement is largely controlled automatically                     |

Cognitive

Associative

Autonomous



# Kolb (1984)

---

## Experiential learning cycle

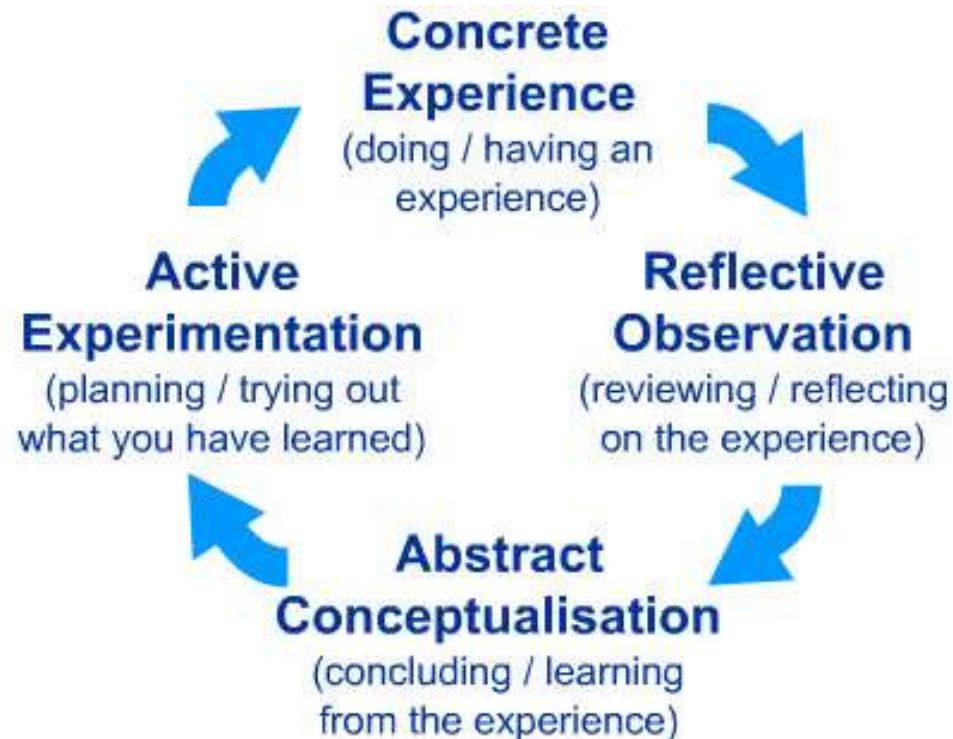

from <https://www.simplypsychology.org/learning-kolb.html>



# Activities:

## Writing in course workbook and group discussions

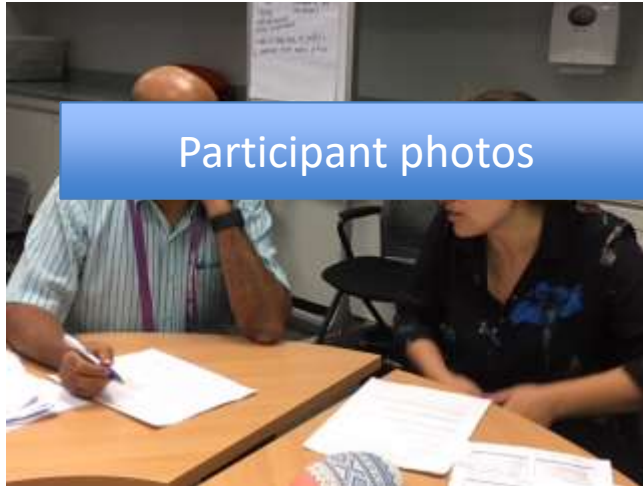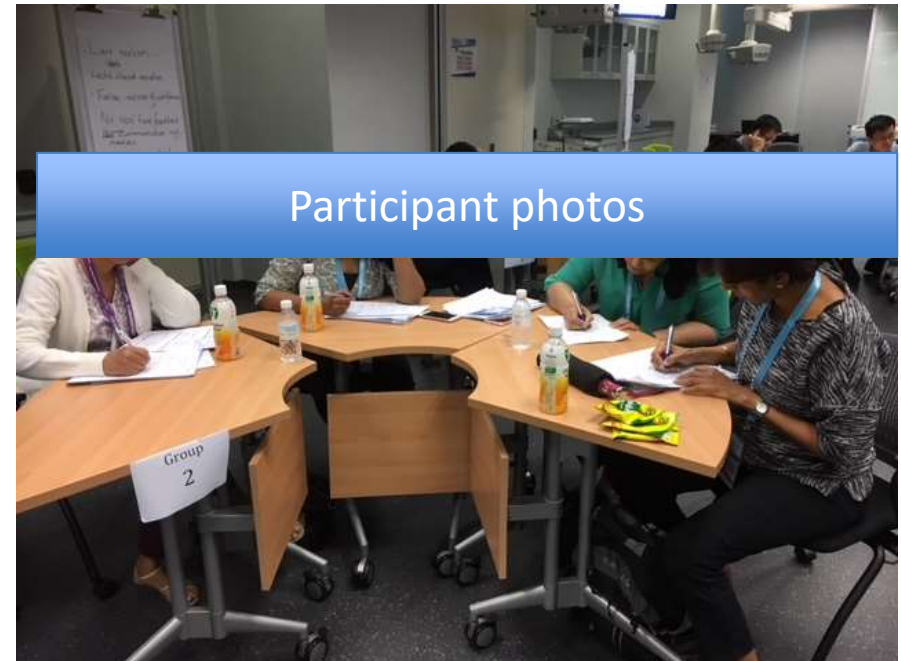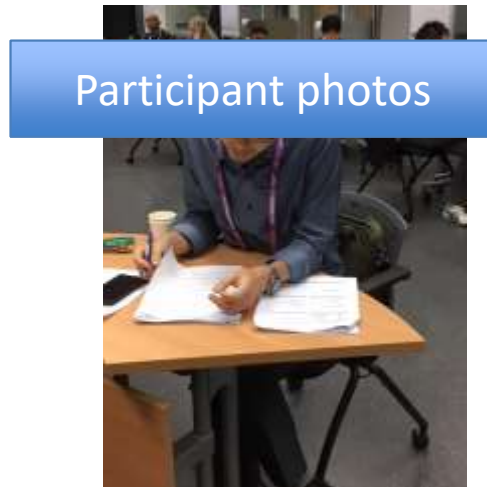

# Peyton (1998)

---

## 4 stage approach to skills development

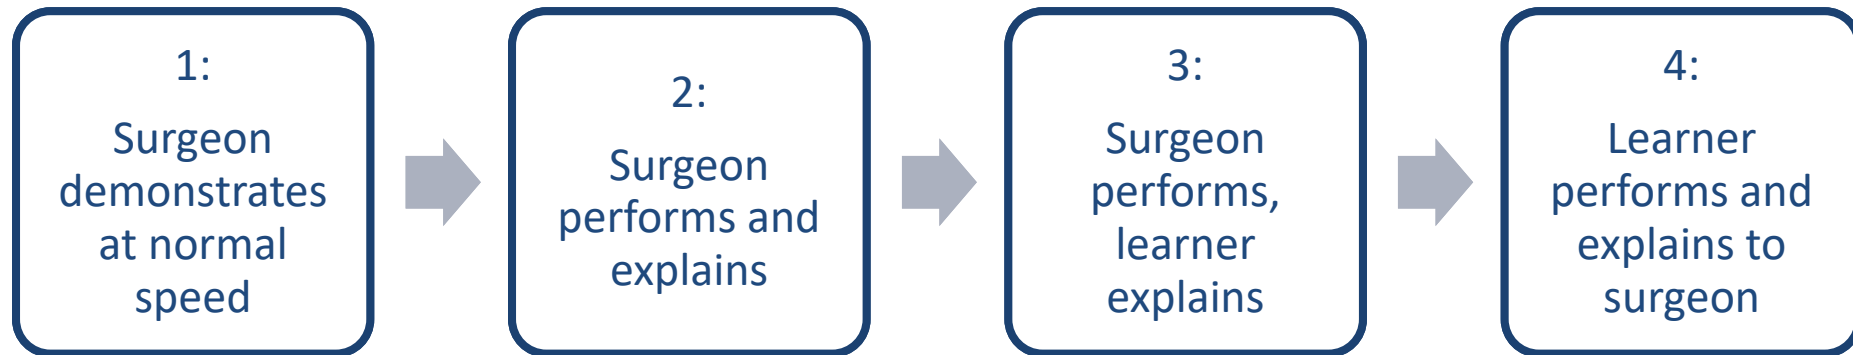

# Activity #7

---

- Groups of 3
- Teach the student to suture/venepuncture using Peyton
- 10 minutes only

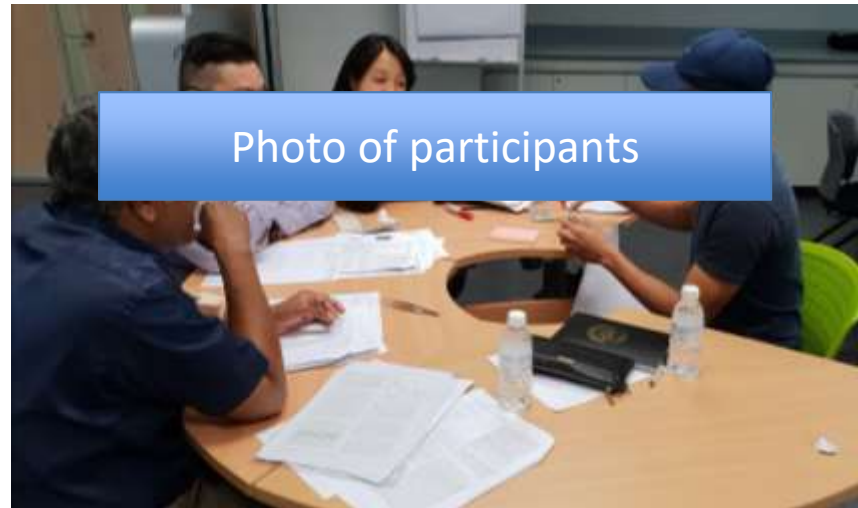

# Simulation-based mastery learning

---

1. Baseline, or diagnostic testing
2. Clear learning objectives, sequenced
3. Engagement in educational activities
4. A set minimum passing standard (e.g., test score)
5. Formative testing to gauge unit completion at a preset minimum passing standard for mastery
6. Advancement to the next educational unit given measured achievement at or above the mastery standard
7. Continued practice or study on an educational unit until the mastery standard is reached

(McGaghie, 2015)

**FOR LATER REFERENCE**

# Evidence-based framework

## Pedagogical framework for procedural skill training

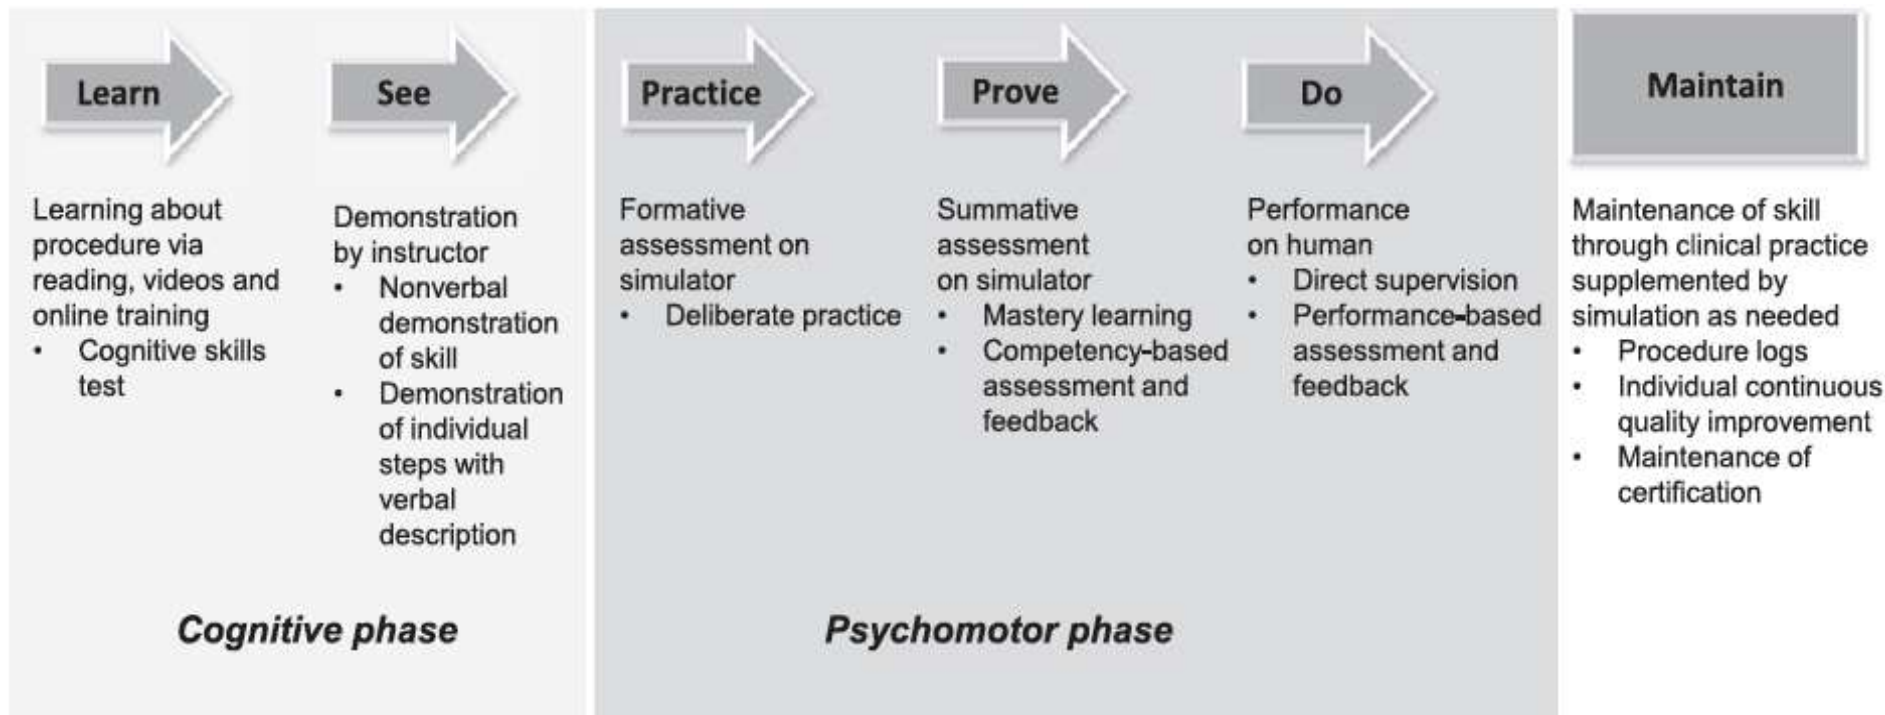

Sawyer et al, 2015

# Activity + group photo

---

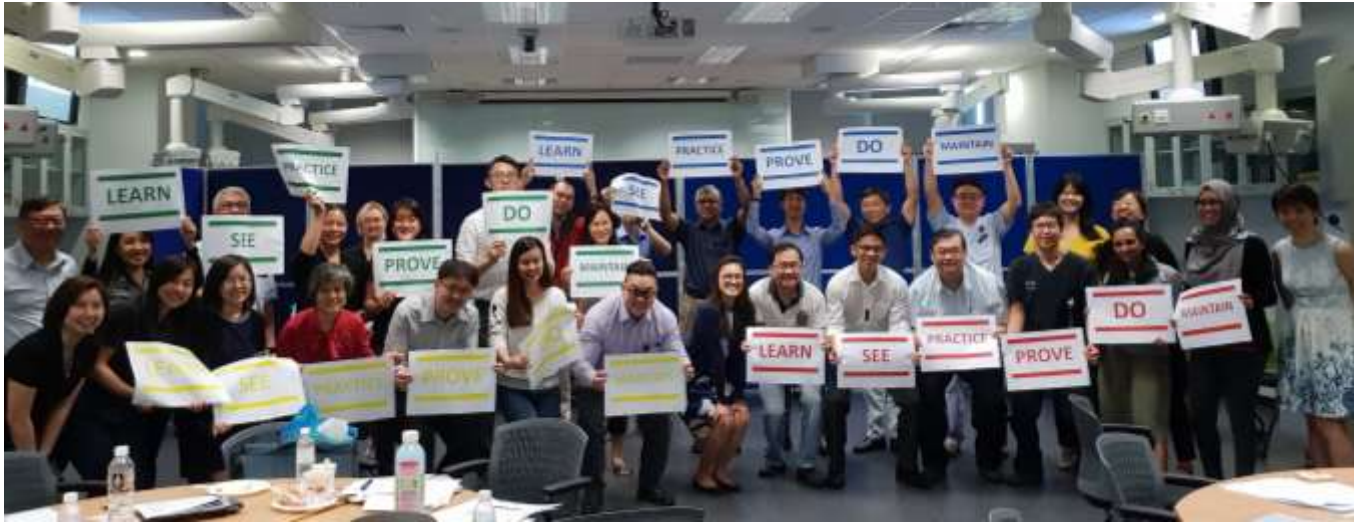

Evidence based framework for procedural skills training:  
Sawyer et al 2015

---

# **Role of feedback in learning**

Session 3

# Models & approaches

---

1. DESC
2. Pendleton
3. Learner-led feedback
4. SHARP

*Others...*



# Video

---

## Surgery ACP Surgical Skills Videos

### Teaching Simple Suturing (Short Version - 4 min)

- The learner is a final year medical student, who has attended 2 suturing workshops prior to this video.
- The teacher is a junior faculty who has been teaching basic surgical skills for four years.

Consent from volunteers have been obtained for this educational video  
Property of Surgery Academic Clinical Programme 2016

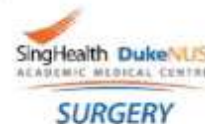

# Activity #8 : Video review

---

- Refer to the video
  - Aim of the simulation activity is to support the student in learning a skill
- **Simulation**
  - Groups of 3 – teacher, student, observer
  - 5 minutes of feedback as if you are the teacher and the student in the video
  - 10 minutes discussing approach used – what was helpful/areas for development

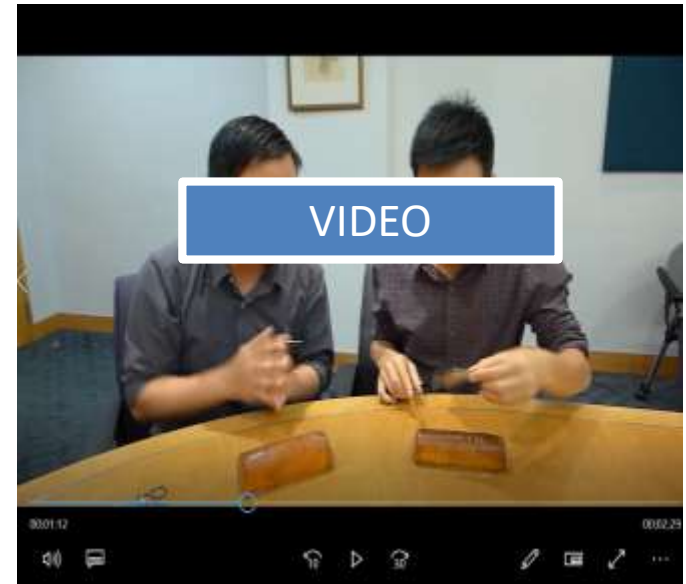

---

# **Design and implement a lesson plan**

Session 4

# Writing learning objectives

---

## Use **behavioural** terms

- Demonstrate
- Perform
- Apply
- Complete
- Achieve
- Master
- Refine
- Accomplish
- Show
- Arrange
- Handle
- Use

After the activity, learners will be able to:

- **Describe** the relevant anatomy for skin and tissues of the lower leg
- **Demonstrate** sensitive handling of tissue
- **Handle** instruments correctly

# Writing lesson plan

Participant photos

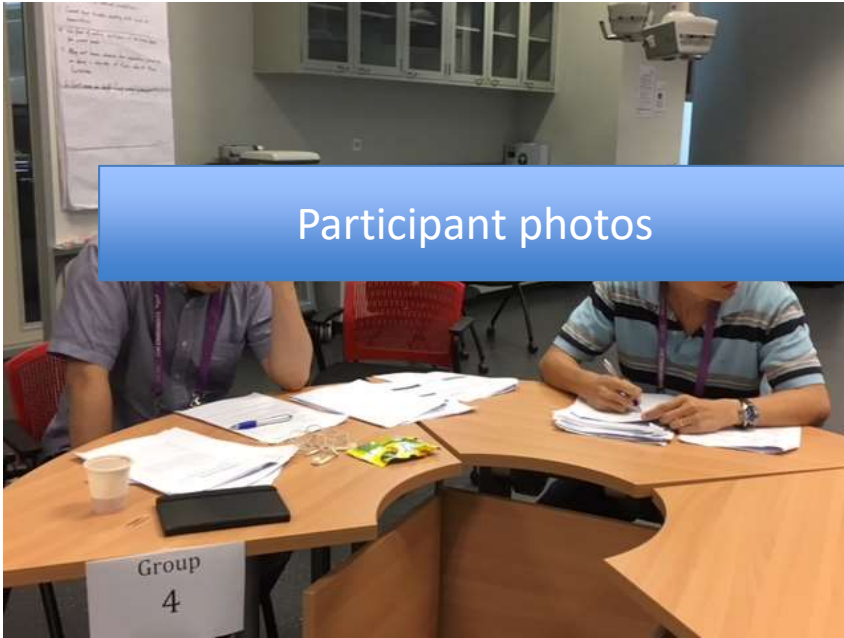

Participant photo

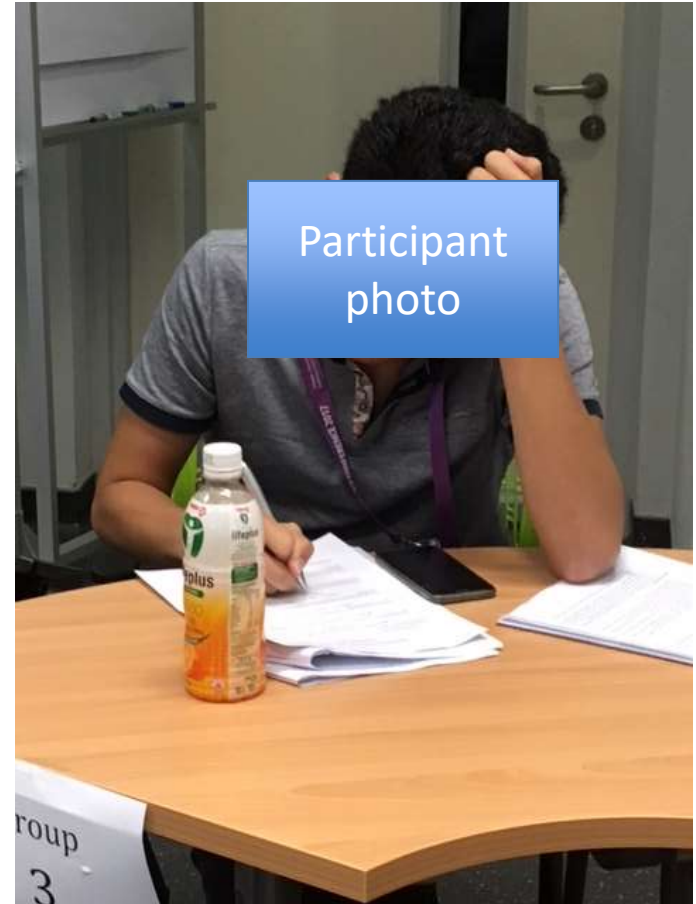

Participant photos

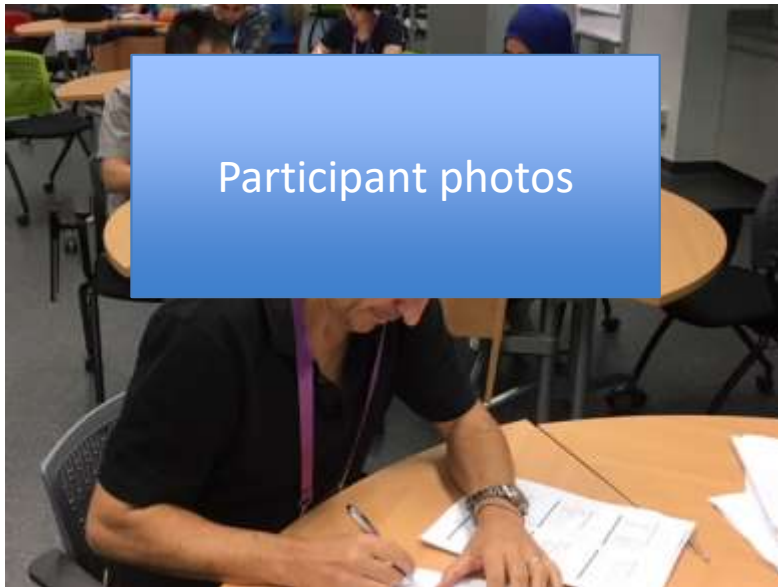

# Implement the lesson plan

---

- Preparation
- Briefing
- Simulation activity
- Feedback/debriefing
- Reflection (not possible in the workshop)
- Evaluation (not possible in the workshop)



Participant photos

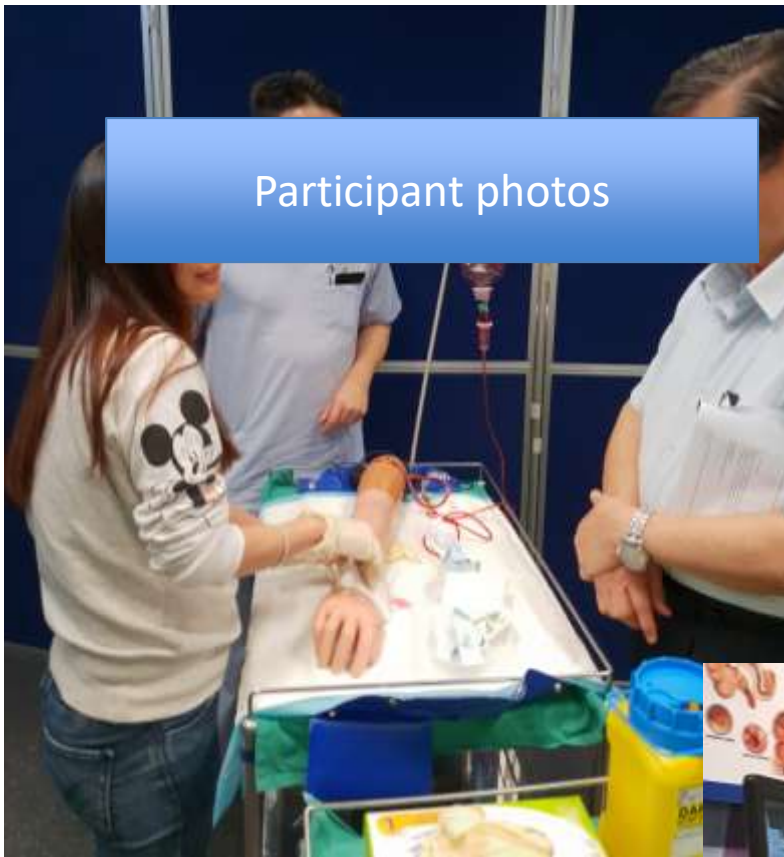

Participant photos

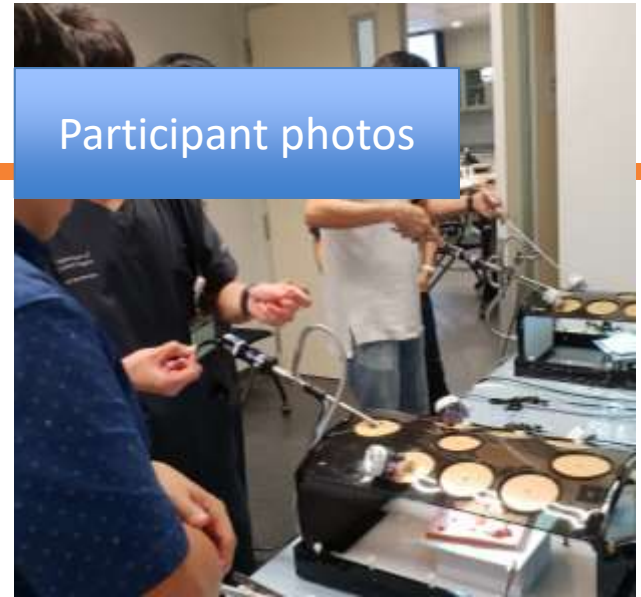

# Implementing the lesson plan

Participant photos

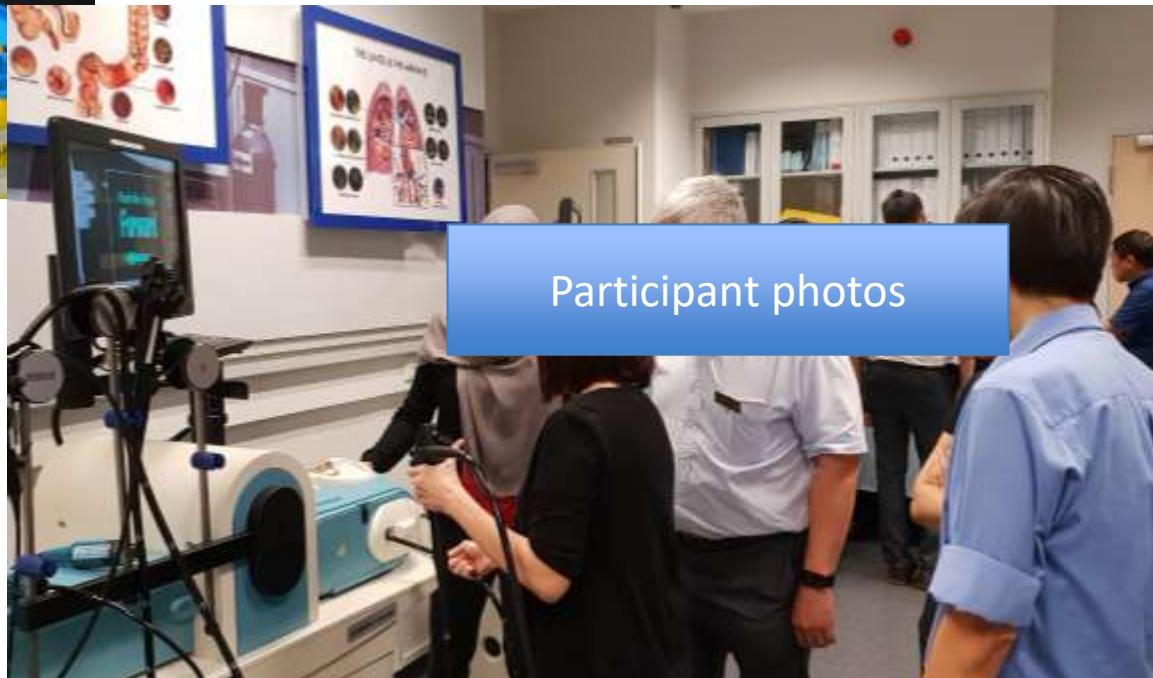

---

# **Reflections, closing & action plan**

Session 5
